# Supplementary material for: Experimental yellow fever virus infection in the squirrel monkey (Saimiri spp.) I: gross anatomical and histopathological findings in organs at necropsy
Source: PubMed Central journal article supplement (PMC7651848; doi:10.1590/0074-02760190501), 2020-11-09
Supplement: 1678-8060-mioc-115-e190501-s.pdf [file 1678-8060-mioc-115-e190501-s.pdf]

TABLE  
Main histopathological changes observed in monkeys' squirrels (*Saimiri* spp.) infected with yellow fever virus (YFV)

| Organ             | dpi                                                                                                                              | Histopathological changes                                                                                                                                                                                                                                                                                                                                                                                                                                                                                                                                                                                                                                                                                                                          |
|-------------------|----------------------------------------------------------------------------------------------------------------------------------|----------------------------------------------------------------------------------------------------------------------------------------------------------------------------------------------------------------------------------------------------------------------------------------------------------------------------------------------------------------------------------------------------------------------------------------------------------------------------------------------------------------------------------------------------------------------------------------------------------------------------------------------------------------------------------------------------------------------------------------------------|
| Heart             | 1 and 6                                                                                                                          | Myocardium with areas close to the endocardium containing myofibrers with increased eosinophilia, nuclear pyknosis and cytoplasmic vacuoles                                                                                                                                                                                                                                                                                                                                                                                                                                                                                                                                                                                                        |
|                   | 2                                                                                                                                | Discrete areas of incipient necrosis in ischemic the endocardium                                                                                                                                                                                                                                                                                                                                                                                                                                                                                                                                                                                                                                                                                   |
|                   | 3                                                                                                                                | Discreet areas of subendocardial incipient ischemic necrosis bordered by vacuolated myocytes                                                                                                                                                                                                                                                                                                                                                                                                                                                                                                                                                                                                                                                       |
| Inoculated area   | 1 and 2                                                                                                                          | Dermis presented mild multifocal perivascular mononuclear infiltrate; inflammatory infiltrate with extensive focal polymorphonuclear and mononuclear cells in the panicle.                                                                                                                                                                                                                                                                                                                                                                                                                                                                                                                                                                         |
|                   | 3                                                                                                                                | Light focal perivascular mononuclear infiltrate in the adipose panicle                                                                                                                                                                                                                                                                                                                                                                                                                                                                                                                                                                                                                                                                             |
|                   | 4 and 5                                                                                                                          | Mild perivascular mononuclear infiltrate in the adipose panicle                                                                                                                                                                                                                                                                                                                                                                                                                                                                                                                                                                                                                                                                                    |
|                   | 6                                                                                                                                | Discrete multifocal perivascular mononuclear infiltrate                                                                                                                                                                                                                                                                                                                                                                                                                                                                                                                                                                                                                                                                                            |
|                   | 7                                                                                                                                | Mononuclear infiltrate in the light focal superficial dermis                                                                                                                                                                                                                                                                                                                                                                                                                                                                                                                                                                                                                                                                                       |
|                   | 10-20                                                                                                                            | Light multifocal perivascular mononuclear infiltrate in the adipose panicle and adjacent muscle                                                                                                                                                                                                                                                                                                                                                                                                                                                                                                                                                                                                                                                    |
| Liver             | 30                                                                                                                               | Light multifocal mononuclear infiltrate in the adipose panicle and adjacent areas                                                                                                                                                                                                                                                                                                                                                                                                                                                                                                                                                                                                                                                                  |
|                   | 1                                                                                                                                | Cytoplasmic swelling and pallor, thin hepatocyte vacuolisation mainly in Z3; moderate diffuse haemosiderosis in Kupffer cells and macrophages in PT and hepatocytes; mononuclear inflammatory infiltrate in mild multifocal PT; haemorrhage in Z2/Z3, steatosis and lytic necrosis in hepatocytes.                                                                                                                                                                                                                                                                                                                                                                                                                                                 |
|                   | 2                                                                                                                                | Hepatocytes with mild cytoplasmic pallor at Z3 and mild diffuse haemosiderosis; dilation of sinusoid capillaries at Z3; haemorrhage in Z2/Z3, steatosis and lytic necrosis in hepatocytes.                                                                                                                                                                                                                                                                                                                                                                                                                                                                                                                                                         |
|                   | 3                                                                                                                                | Light diffuse swelling and cytoplasmic pallor; mild diffuse haemosiderosis in Kupffer cells; mononuclear inflammatory infiltrate with rare eosinophils in mild multifocal PT; mononuclear inflammatory infiltrate with random multifocal neutrophils between the strands of hepatocytes; haemorrhage in Z2/Z3, steatosis and lytic necrosis in hepatocytes.                                                                                                                                                                                                                                                                                                                                                                                        |
|                   | 4                                                                                                                                | Light to moderate multifocal PT mononuclear inflammatory infiltrate and mononuclear infiltrate with random multifocal neutrophils between the hepatocyte strands; diffuse hepatocyte swelling and cytoplasmic pallor; mild diffuse haemosiderosis; haemorrhage in Z2/Z3, steatosis and lytic necrosis in hepatocytes.                                                                                                                                                                                                                                                                                                                                                                                                                              |
|                   | 5                                                                                                                                | Mild diffuse haemosiderosis and moderate hepatocyte cytoplasmic vacuolation and PT; individual hepatocyte necrosis is rarely found; haemorrhage in Z2/Z3, steatosis and lytic necrosis in hepatocytes.                                                                                                                                                                                                                                                                                                                                                                                                                                                                                                                                             |
|                   | 6                                                                                                                                | Coagulation necrosis in Z2/Z3 massive and marked diffuse associated with congestion and haemorrhage; hepatocytes with granulated and eosinophilic cytoplasm, karyolysis, pyknosis and karyorexia; Kupffer cells were found at Z2/Z3 with abundant, granulated and eosinophilic cytoplasm, vacuoles and nuclear debris (Councilman bodies); endothelial cells present moderate swelling and occasionally there are clusters of polymorphonuclear cells. In the PT and remaining hepatocytes present swelling and vacuolisation of the cytoplasm; rare intranuclear eosinophilic linear inclusions (including brick or "blochlike") inclusions have been observed in hepatocytes; haemorrhage in Z2/Z3, steatosis and lytic necrosis in hepatocytes. |
|                   | 7                                                                                                                                | Mononuclear infiltrate predominantly in mild multifocal PT and mild diffuse vacuolisation of hepatocytes                                                                                                                                                                                                                                                                                                                                                                                                                                                                                                                                                                                                                                           |
|                   | 10                                                                                                                               | Hepatocyte swelling with diffuse mild to moderate cytoplasmic vacuolation, more intense in Z3; light multifocal mononuclear infiltrate.                                                                                                                                                                                                                                                                                                                                                                                                                                                                                                                                                                                                            |
|                   | 20                                                                                                                               | Diffuse hepatocyte vacuolisation, more intense in Z3; mild haemosiderosis.                                                                                                                                                                                                                                                                                                                                                                                                                                                                                                                                                                                                                                                                         |
| 30                | Hepatocyte swelling and vacuolisation mainly in mild diffuse Z3; mild haemosiderosis and mild multifocal mononuclear infiltrate. |                                                                                                                                                                                                                                                                                                                                                                                                                                                                                                                                                                                                                                                                                                                                                    |
| Spleen            | 1                                                                                                                                | Pyknotic nodules and debris within follicles and in the cytoplasm of follicular macrophages, with mild lymphoid depletion                                                                                                                                                                                                                                                                                                                                                                                                                                                                                                                                                                                                                          |
|                   | 2                                                                                                                                | Mild lymphoid depletion with discrete neutrophil infiltrate; some with pyknotic nuclei, free debris in the follicles or in macrophages.                                                                                                                                                                                                                                                                                                                                                                                                                                                                                                                                                                                                            |
|                   | 3                                                                                                                                | Centrofollicular rarefaction with pyknotic nuclei and debris; prominent and binucleated macrophages, with eosinophilic material and cytoplasmic nuclear remains.                                                                                                                                                                                                                                                                                                                                                                                                                                                                                                                                                                                   |
|                   | 4                                                                                                                                | White pulp with centrofollicular rarefaction, moderate depletion with lymphocytes with pyknotic nuclei and prominent macrophages containing nuclear remains and eosinophilic material in the cytoplasm                                                                                                                                                                                                                                                                                                                                                                                                                                                                                                                                             |
|                   | 5                                                                                                                                | White pulp follicles with retracted lymphocytes with pyknotic nuclei and prominent macrophages containing lumpy eosinophilic material and nuclear remains                                                                                                                                                                                                                                                                                                                                                                                                                                                                                                                                                                                          |
|                   | 6                                                                                                                                | Rare pyknotic lymphocytes and nuclear debris; mild extramedullary haematopoiesis; well-defined follicle; bleeding was also observed in the centre of the cortical region.                                                                                                                                                                                                                                                                                                                                                                                                                                                                                                                                                                          |
|                   | 7                                                                                                                                | Follicular macrophages containing eosinophilic cell debris and cell debris in the cytoplasm; mild diffuse lymphoid hyperplasia and congestion with necrosis in the follicles that was characterised by the presence of debris in the macrophage cytoplasm.                                                                                                                                                                                                                                                                                                                                                                                                                                                                                         |
|                   | 10                                                                                                                               | Moderate centrofollicular degeneration and presence of macrophages with cellular debris                                                                                                                                                                                                                                                                                                                                                                                                                                                                                                                                                                                                                                                            |
|                   | 20                                                                                                                               | Individual necrosis of small groups of lymphocytes with the presence of macrophages containing cellular debris; neutrophils with swollen cytoplasm.                                                                                                                                                                                                                                                                                                                                                                                                                                                                                                                                                                                                |
|                   | 30                                                                                                                               | Rarefaction of follicles with individual necrosis of small groups of lymphocytes, neutrophils and macrophages containing cellular debris                                                                                                                                                                                                                                                                                                                                                                                                                                                                                                                                                                                                           |
| Lung              | 1-7                                                                                                                              | Light diffuse congestion                                                                                                                                                                                                                                                                                                                                                                                                                                                                                                                                                                                                                                                                                                                           |
|                   | 6                                                                                                                                | Oedema, congestion, severe haemorrhage and mononuclear inflammatory infiltrate                                                                                                                                                                                                                                                                                                                                                                                                                                                                                                                                                                                                                                                                     |
|                   | 10                                                                                                                               | Mild diffuse congestion with multifocal atelectasis; rare areas of tubular mineralisation in the spinal cord.                                                                                                                                                                                                                                                                                                                                                                                                                                                                                                                                                                                                                                      |
|                   | 20                                                                                                                               | Anthraxnose and mild diffuse congestion; rare areas of tubular mineralisation in the spinal cord.                                                                                                                                                                                                                                                                                                                                                                                                                                                                                                                                                                                                                                                  |
| 30                | Light diffuse congestion                                                                                                         |                                                                                                                                                                                                                                                                                                                                                                                                                                                                                                                                                                                                                                                                                                                                                    |
| Kidney            | 2-5                                                                                                                              | Light multifocal interstitial mononuclear infiltrate and rare eosinophils                                                                                                                                                                                                                                                                                                                                                                                                                                                                                                                                                                                                                                                                          |
|                   | 6                                                                                                                                | Discrete multifocal interstitial mononuclear infiltrate; cytoplasm vacuolisation, haemorrhagic spots on Bowman's capsule and tubular necrosis.                                                                                                                                                                                                                                                                                                                                                                                                                                                                                                                                                                                                     |
|                   | 7                                                                                                                                | Light diffuse congestion with areas of discrete multifocal tubular calcification in the spinal cord                                                                                                                                                                                                                                                                                                                                                                                                                                                                                                                                                                                                                                                |
|                   | 10-20                                                                                                                            | Rare foci of mineralisation in the spinal cord                                                                                                                                                                                                                                                                                                                                                                                                                                                                                                                                                                                                                                                                                                     |
| Stomach           | 1 and 2                                                                                                                          | Light multifocal mononuclear infiltrate with eosinophils on the <i>lamina propria</i>                                                                                                                                                                                                                                                                                                                                                                                                                                                                                                                                                                                                                                                              |
|                   | 3                                                                                                                                | Occasional individual cells in the mucosa with eosinophilia and pyknosis                                                                                                                                                                                                                                                                                                                                                                                                                                                                                                                                                                                                                                                                           |
|                   | 4                                                                                                                                | Mononuclear infiltrate with eosinophils in the light diffuse submucosa                                                                                                                                                                                                                                                                                                                                                                                                                                                                                                                                                                                                                                                                             |
| Axial lymph nodes | 6                                                                                                                                | Moderate number of acidophilic cells with nuclear pyknosis and increased eosinophilia                                                                                                                                                                                                                                                                                                                                                                                                                                                                                                                                                                                                                                                              |
|                   | 10                                                                                                                               | Light mononuclear infiltrate with eosinophils in the submucosa                                                                                                                                                                                                                                                                                                                                                                                                                                                                                                                                                                                                                                                                                     |
|                   | 2-6                                                                                                                              | Moderate haemosiderosis and non-evident follicles                                                                                                                                                                                                                                                                                                                                                                                                                                                                                                                                                                                                                                                                                                  |
|                   | 7                                                                                                                                | Mild diffuse lymphoid hyperplasia and congestion                                                                                                                                                                                                                                                                                                                                                                                                                                                                                                                                                                                                                                                                                                   |
|                   | 10                                                                                                                               | Moderate lymphocyte necrosis characterised by the presence of debris in the macrophage cytoplasm                                                                                                                                                                                                                                                                                                                                                                                                                                                                                                                                                                                                                                                   |
| Brain             | 20                                                                                                                               | Mild individual lymphocyte necrosis in the follicles characterised by the presence of debris in the macrophage cytoplasm; there is a small amount of foamy macrophages in the spinal cord and occasional clear vacuoles between the lymphocytes in the cortex.                                                                                                                                                                                                                                                                                                                                                                                                                                                                                     |
|                   | 30                                                                                                                               | Discreet individual lymphocyte necrosis in the follicles with a small amount of foamy macrophages in the spinal cord                                                                                                                                                                                                                                                                                                                                                                                                                                                                                                                                                                                                                               |
|                   | 2                                                                                                                                | Parietal, occipital and frontal cortex with focal calcification in the leptomeninges extending to the superficial layer of the cortex                                                                                                                                                                                                                                                                                                                                                                                                                                                                                                                                                                                                              |
|                   | 3                                                                                                                                | Parietal cortex with mononuclear inflammatory infiltrate in mild multifocal leptomeninges                                                                                                                                                                                                                                                                                                                                                                                                                                                                                                                                                                                                                                                          |
| Brain             | 6                                                                                                                                | Occipital cortex with deep layers of white matter; there is a vacuolisation area of the neuropile where there are astrocytes with abundant eosinophilic cytoplasm; occasionally, in other areas in the white matter without vacuolisation.                                                                                                                                                                                                                                                                                                                                                                                                                                                                                                         |
|                   | 7                                                                                                                                | Cerebellum with discrete vacuolisation in white matter                                                                                                                                                                                                                                                                                                                                                                                                                                                                                                                                                                                                                                                                                             |

dpi: days post-infection; PT: portal tract.
